# Supplementary material for: Phylogenetic relationship of the Brazilian isolates of the rat lungworm Angiostrongylus cantonensis (Nematoda: Metastrongylidae) employing mitochondrial COI gene sequence data
Source: PubMed Central journal article supplement (PMC3514143; doi:10.1186/1756-3305-5-248), 2012-11-06

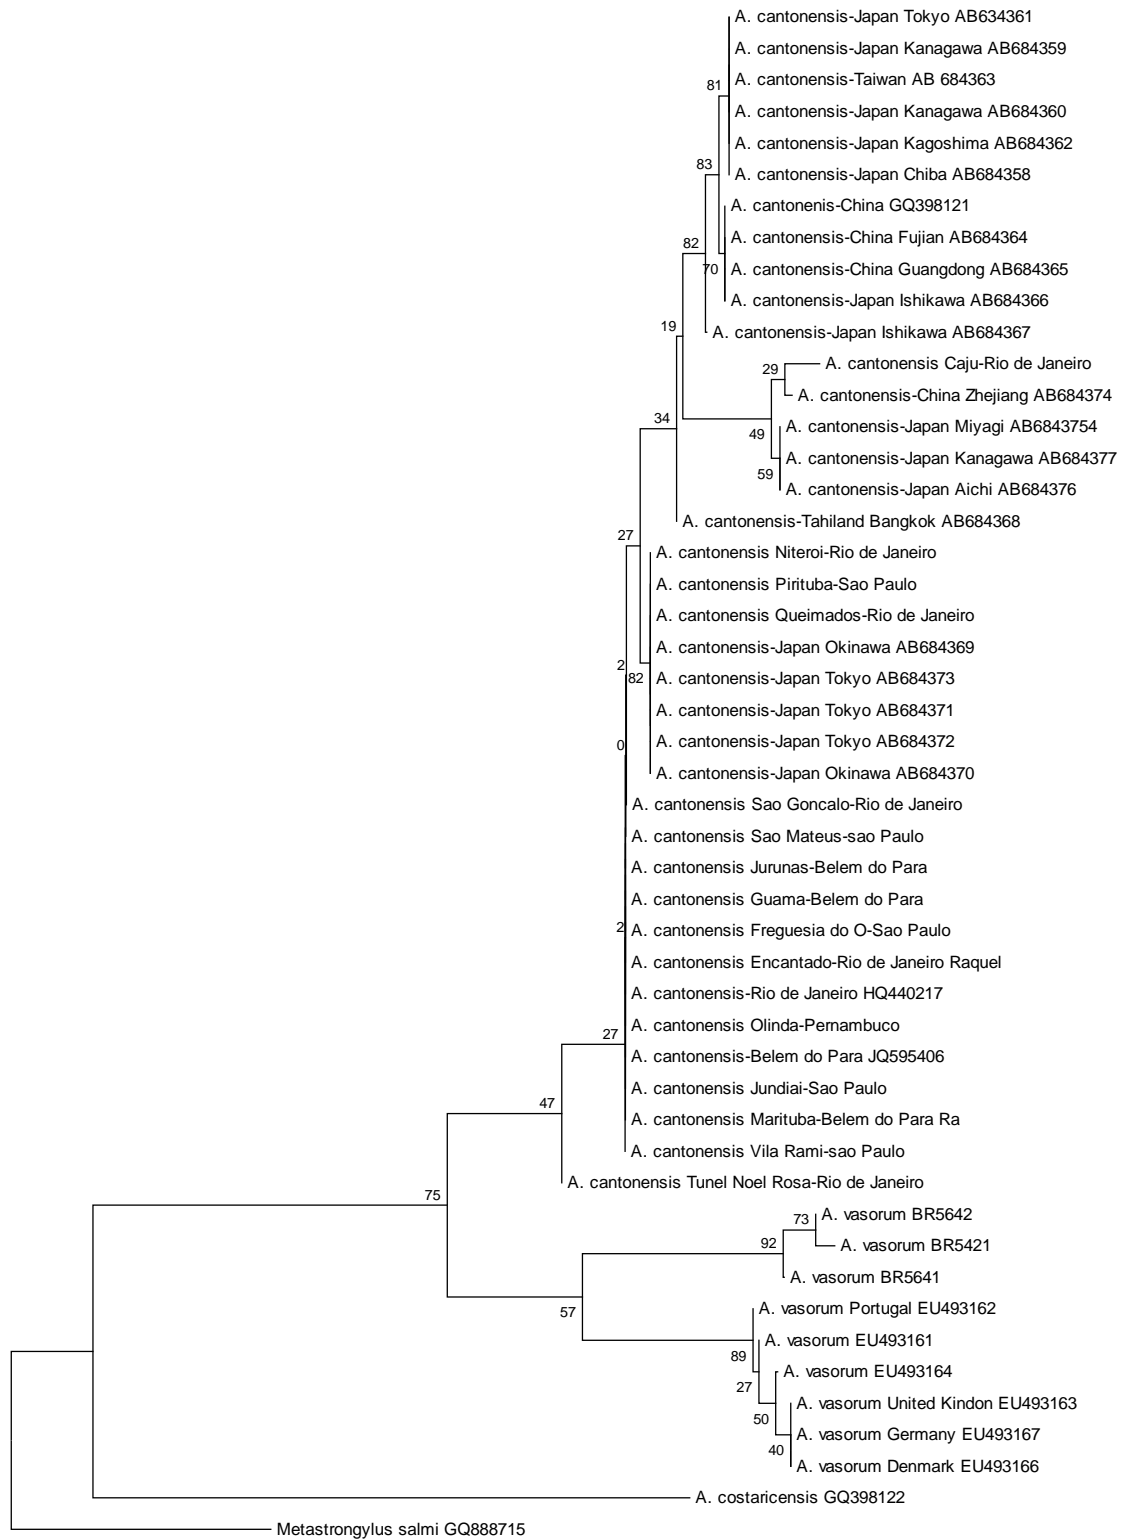

Supplement: 1756-3305-5-248-S1.pdf [file 1756-3305-5-248-S1.pdf]
